# Supplementary material for: Neuroendocrine and metabolic components of dopamine agonist amelioration of metabolic syndrome in SHR rats
Source: PubMed Central journal article supplement (PMC4416398; doi:10.1186/1758-5996-6-104), 2014-09-25
Supplement: 13098_2014_418_MOESM2_ESM.pdf [file 13098_2014_418_MOESM2_ESM.pdf]

**A**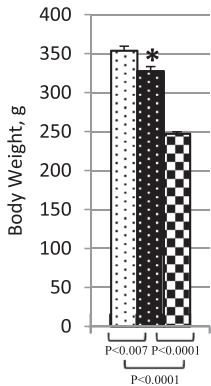**B**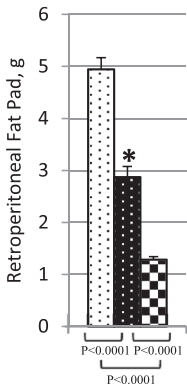**C**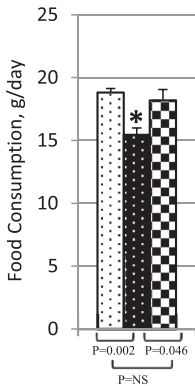**D**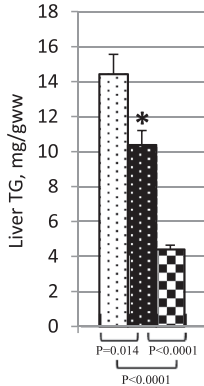


SHR rats treated with vehicle control



SHR rats treated with  
Timed Daily Bromocriptine



Wistar rats
